# Supplementary material for: Synthesis of tosyl starch in eco-friendly media
Source: Royal Society of Chemistry journal article supplement (doi:10.1039/d3nj00830d), 2023-01-01
Supplement: d3nj00830d1.pdf [file d3nj00830d1.pdf]

## Electronic Supplementary Information (ESI)

# Synthesis of Tosylated Starch in Eco-Friendly Media

Phitawat Namnoud,<sup>a</sup> Manisa Kongkaew,<sup>b</sup> Suttiporn Pikulthong,<sup>a</sup> Rungtiwa Wongsagonsup,<sup>c</sup> Taweechai Amornsakchai,<sup>a</sup> Siwaporn Meejoo Smith,<sup>a\*</sup> and Thanthapatra Bunchuay<sup>a</sup>

<sup>a</sup> Department of Chemistry, Faculty of Science, Mahidol University, Rama VI Rd, Bangkok 10400, Thailand.

<sup>b</sup> Department of Science and Technology, Faculty of Science, Pibulsongkram Rajabhat University, Phlai Chumphon, Mueang Phitsanulok District, Phitsanulok 65000, Thailand

<sup>c</sup> Food Technology Division, School of Interdisciplinary Studies, Mahidol University, Kanchanaburi Campus, Kanchanaburi, 71150, Thailand

Email: siwaporn.smi@mahidol.ac.th, siwaporn.smi@mahidol.edu

### 1. Dissolution of starch in aqueous solutions

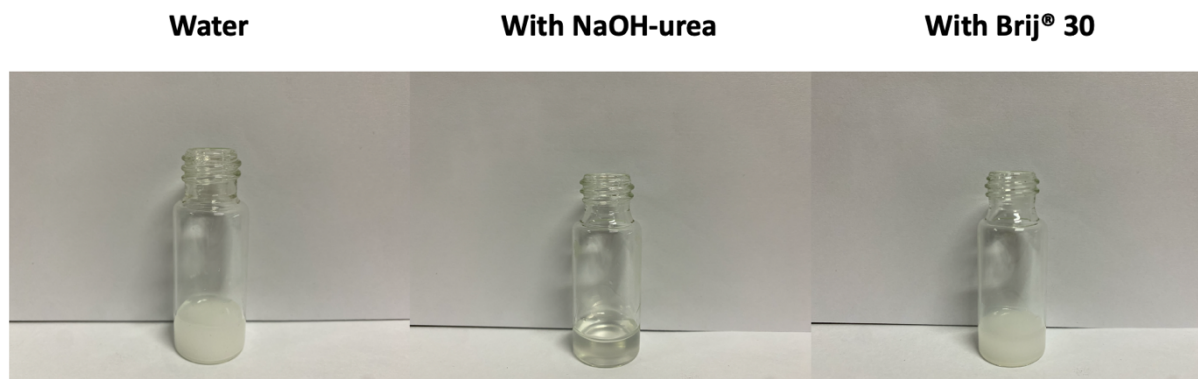

**Fig. S1** Homogeneous dissolution of starch in water facilitated by the addition of NaOH-urea and a surfactant (Brij® 30)

## 2. ATR-FTIR spectra of starch synthesised from aqueous solution containing surfactants

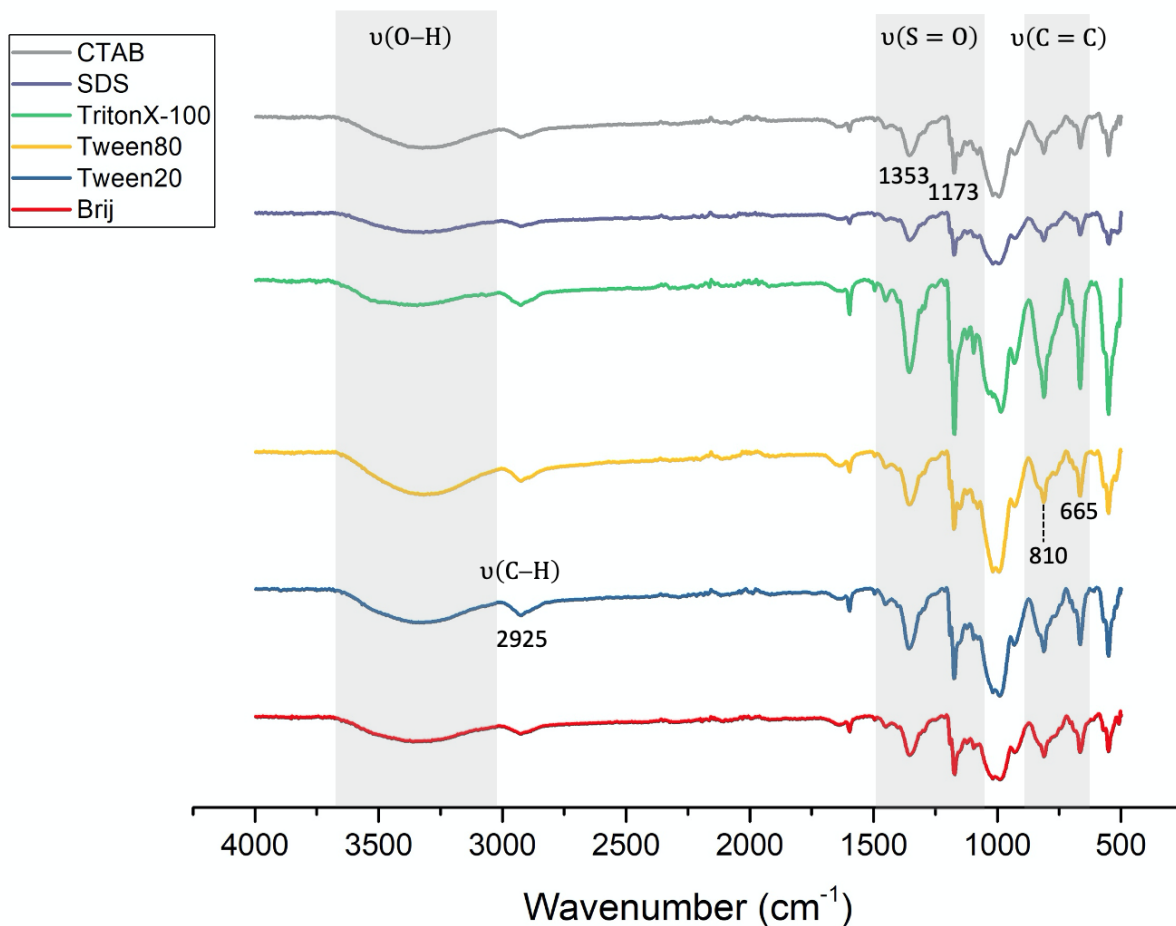

**Fig. S2** FTIR spectra of tosyl starch samples obtained under aqueous NaOH-urea with the addition of different surfactants.

**Table S1** FTIR peak assignments of tosyl starch samples.

| $\bar{\nu}(\text{cm}^{-1})$ | Vibrational Mode                         |
|-----------------------------|------------------------------------------|
| 3600-3000                   | O-H stretching                           |
| 2925                        | $\text{CH}_2$ , $\text{CH}_3$ stretching |
| 1597                        | Aromatic C=C stretching                  |
| 1353                        | Symmetric S=O stretching                 |
| 1173                        | Asymmetric S=O stretching                |
| 810, 665                    | Aromatic C=C bending                     |



### 3.3 Tosyl starch prepared in DMA/LiCl system

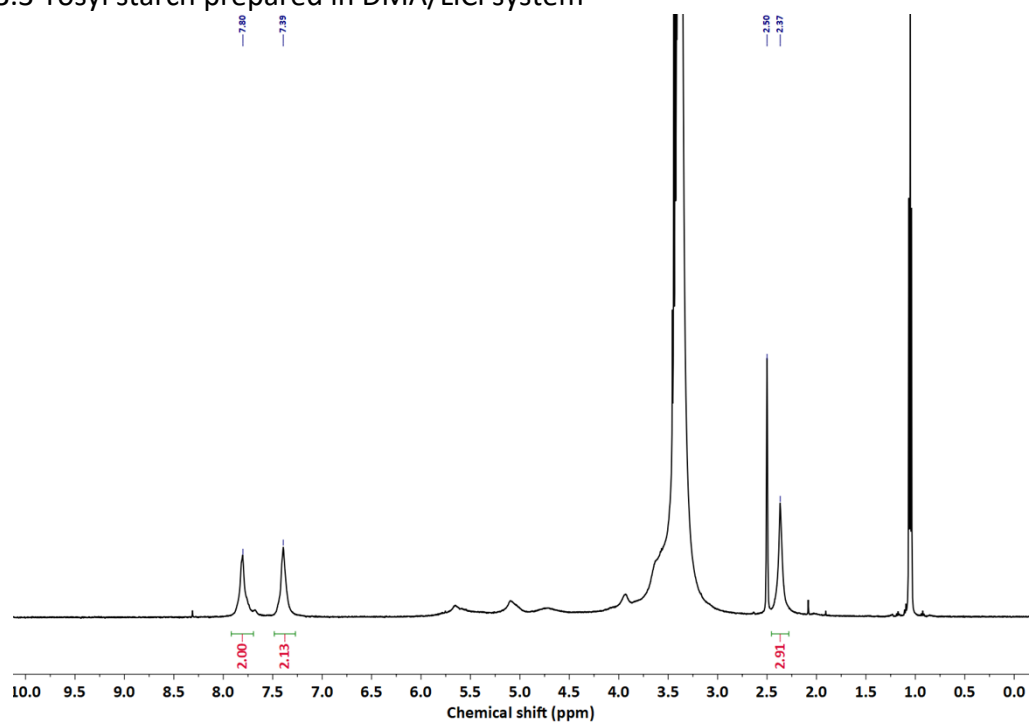

**Fig. S5**  $^1\text{H}$  NMR spectrum (400 MHz, DMSO- $d_6$ , 298 K) of tosyl starch (DMA/LiCl system)

#### 4. $^1\text{H}$ -NMR spectra of tosyl starch samples prepared in NaOH-urea systems

##### 4.1 Brij<sup>®</sup> 30

##### 4.1.1 Brij<sup>®</sup> 30 (2.62 mmol) and TsCl (4 equiv. per AGU)

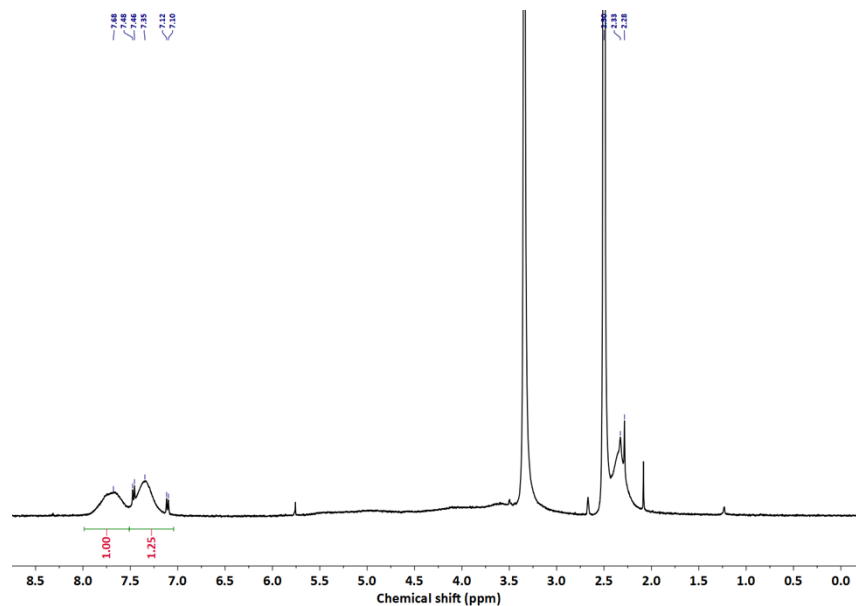

**Fig. S6**  $^1\text{H}$  NMR spectrum (400 MHz, DMSO- $d_6$ , 298 K) of tosyl starch prepared in Brij<sup>®</sup> 30 (2.62 mmol) in the presence of TsCl (4 equiv. per AGU)

##### 4.1.2 Brij<sup>®</sup> 30 (1.57 mmol) and TsCl (4 equiv. per AGU)

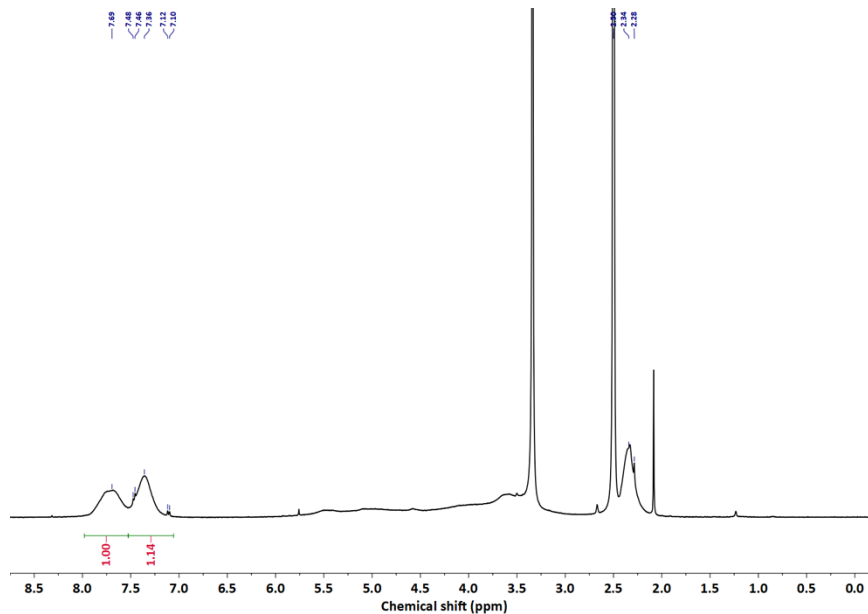

**Fig. S7**  $^1\text{H}$  NMR spectrum (400 MHz, DMSO- $d_6$ , 298 K) of tosyl starch prepared in Brij<sup>®</sup> 30 (1.57 mmol) in the presence of TsCl (4 equiv. per AGU)

#### 4.1.3 Brij® 30 (1.05 mmol) and TsCl (4 equiv. per AGU)

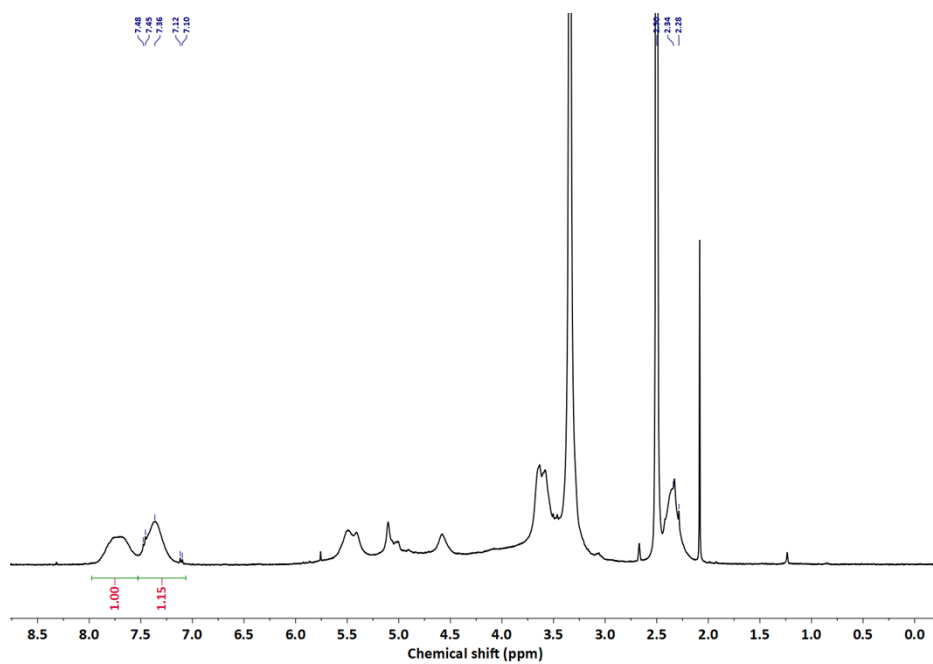

**Fig. S8**  $^1\text{H}$  NMR spectrum (400 MHz, DMSO- $d_6$ , 298 K) of tosyl starch prepared in Brij® 30 (1.05 mmol) in the presence of TsCl (4 equiv. per AGU)

#### 4.1.4 Brij® 30 (0.52 mmol) and TsCl (4 equiv. per AGU)

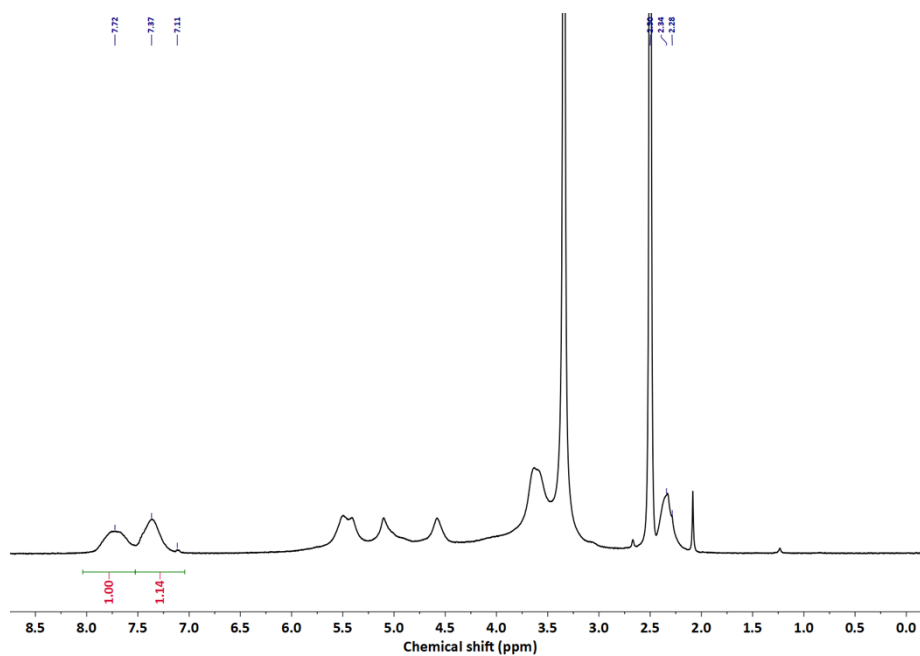

**Fig. S9**  $^1\text{H}$  NMR spectrum (400 MHz, DMSO- $d_6$ , 298 K) of tosyl starch prepared in Brij® 30 (0.52 mmol) in the presence of TsCl (4 equiv. per AGU)

#### 4.1.5 Brij® 30 (2.62 mmol) and TsCl (3 equiv. per AGU)

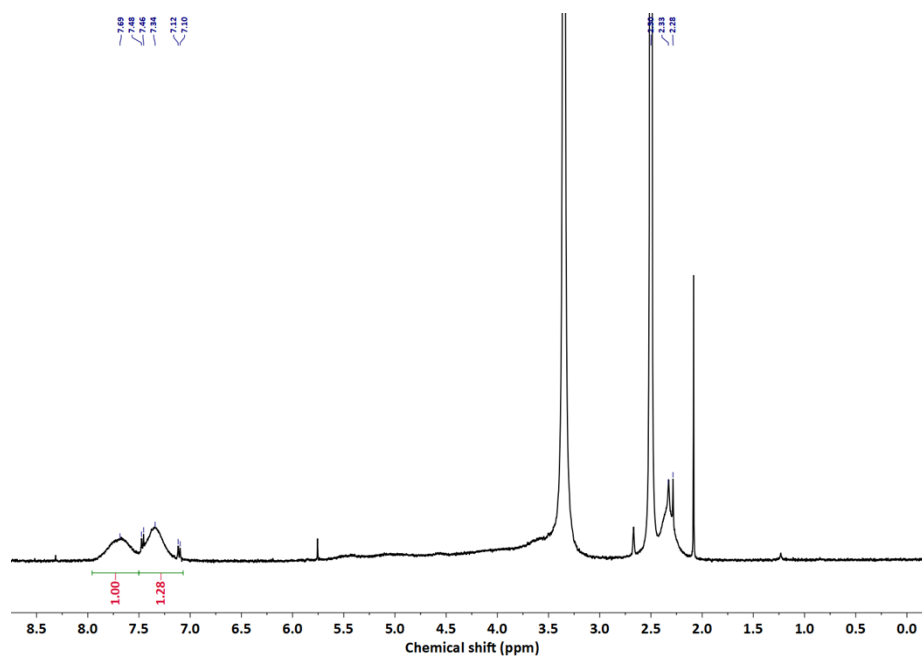

**Fig. S10**  $^1\text{H}$  NMR spectrum (400 MHz, DMSO- $d_6$ , 298 K) of tosyl starch prepared in Brij® 30 (2.62 mmol) in the presence of TsCl (3 equiv. per AGU)

#### 4.1.6 Brij® 30 (2.62 mmol) and TsCl (2 equiv. per AGU)

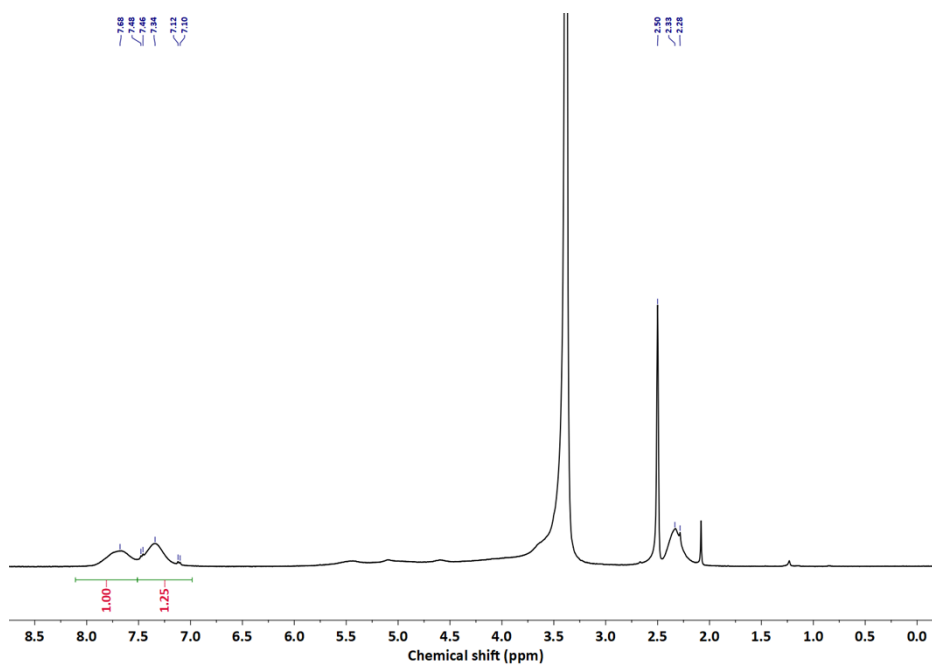

**Fig. S11**  $^1\text{H}$  NMR spectrum (400 MHz, DMSO- $d_6$ , 298 K) of tosyl starch prepared in Brij® 30 (2.62 mmol) in the presence of TsCl (2 equiv. per AGU)

#### 4.1.7 Brij® 30 (2.62 mmol) and TsCl (1 equiv. per AGU)

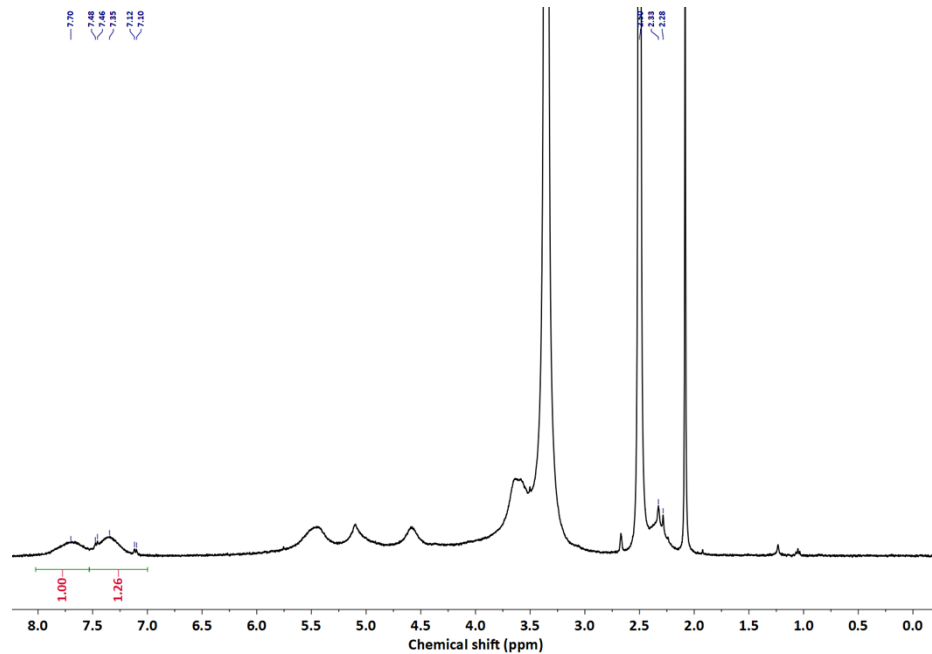

**Fig. S12** <sup>1</sup>H NMR spectrum (400 MHz, DMSO-d<sub>6</sub>, 298 K) of tosyl starch prepared in Brij® 30 (2.62 mmol) in the presence of TsCl (1 equiv. per AGU)

#### 4.2 Tween®20

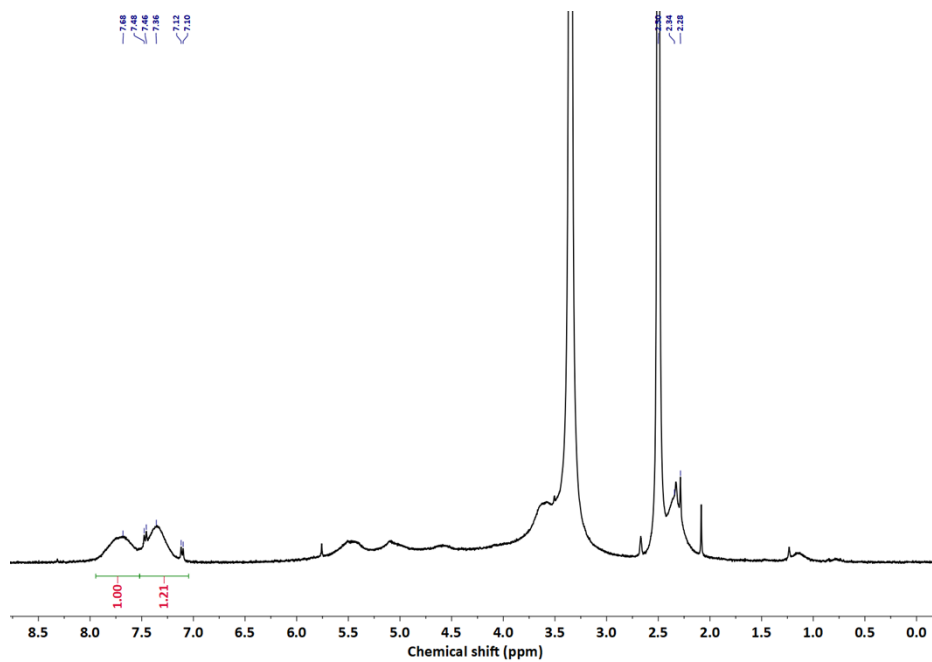

**Fig. S13** <sup>1</sup>H NMR spectrum (400 MHz, DMSO-d<sub>6</sub>, 298 K) of tosyl starch prepared in Tween®20 (2.62 mmol) in the presence of TsCl (equiv. per AGU)



#### 4.3 Tween<sup>®</sup>80

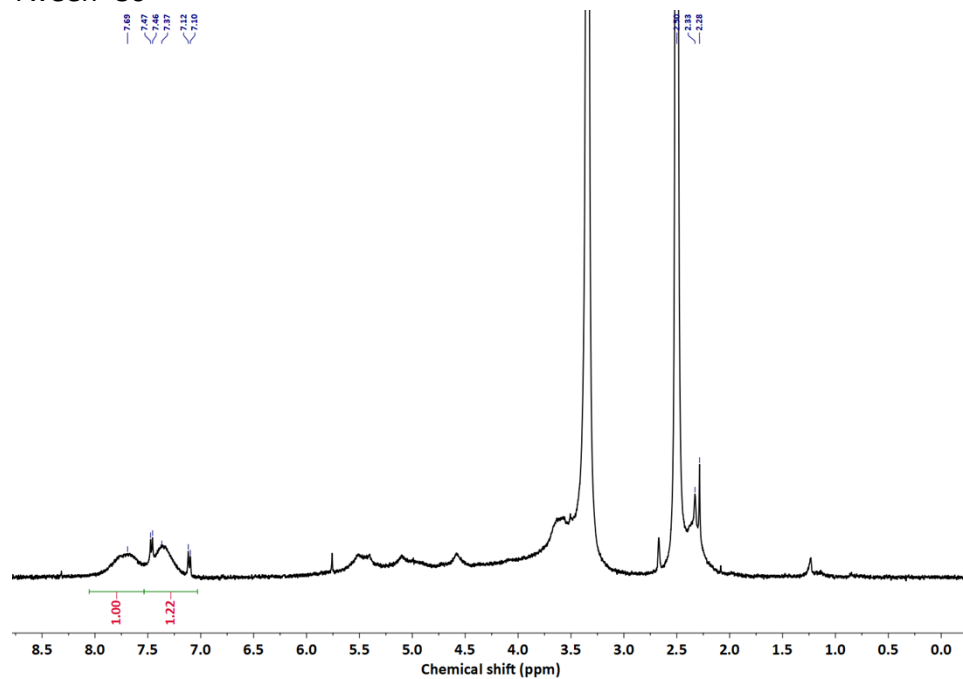

**Fig. S14** <sup>1</sup>H NMR spectrum (400 MHz, DMSO-d<sub>6</sub>, 298 K) of tosyl starch prepared in Tween<sup>®</sup>80 (2.62 mmol) in the presence of TsCl (equiv. per AGU)

#### 4.4 Triton<sup>™</sup>X-100

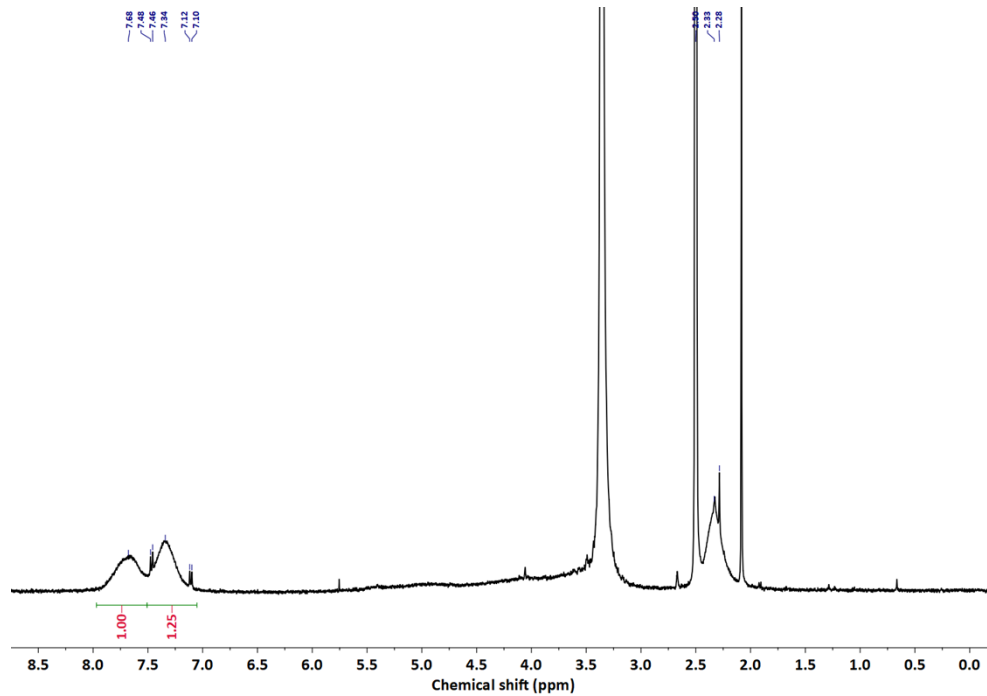

**Fig. S15** <sup>1</sup>H NMR spectrum (400 MHz, DMSO-d<sub>6</sub>, 298 K) of tosyl starch prepared in Triton<sup>™</sup>X-100 (2.62 mmol) in the presence of TsCl (equiv. per AGU)

#### 4.5 Sodium dodecyl sulfate (SDS)

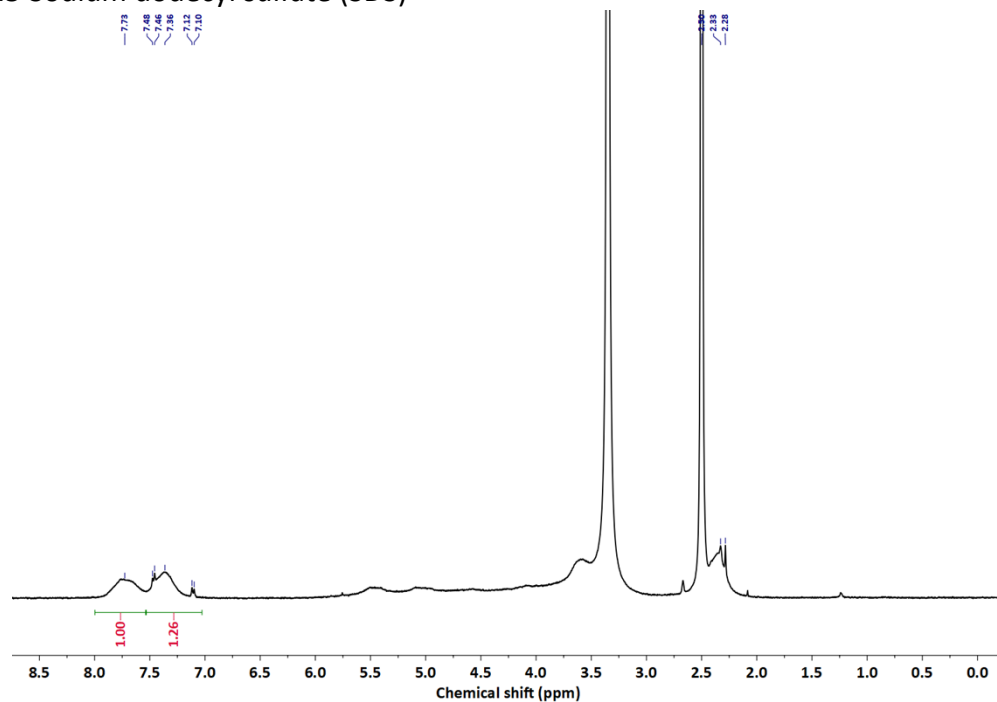

**Fig. S16** <sup>1</sup>H NMR spectrum (400 MHz, DMSO-d<sub>6</sub>, 298 K) of tosyl starch prepared in SDS (2.62 mmol) in the presence of TsCl (equiv. per AGU)

#### 4.6 Hexadecyltrimethylammonium bromide (CTAB)

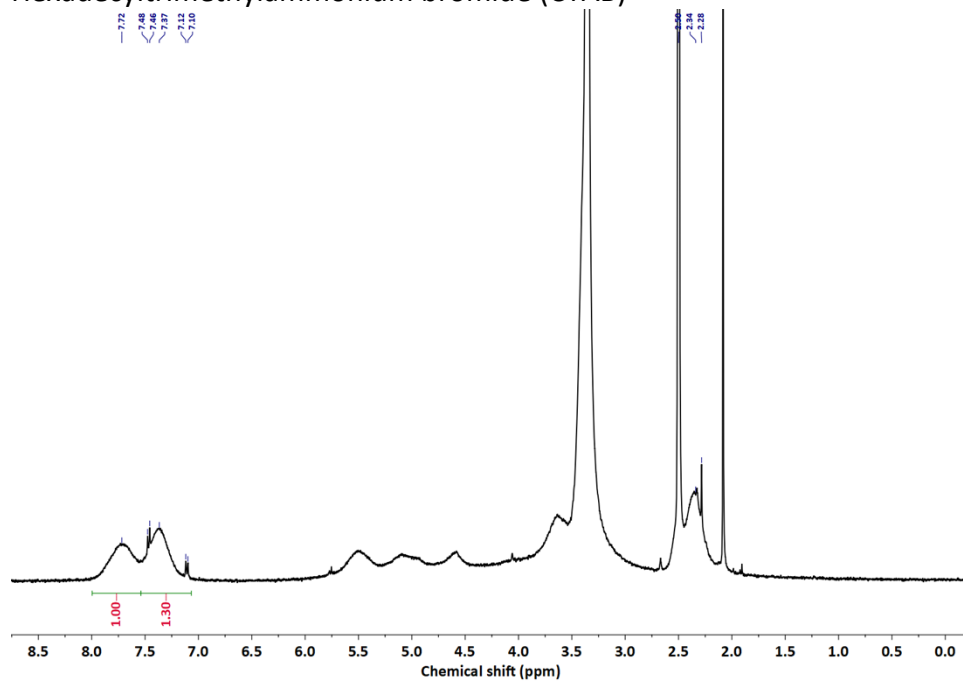

**Fig. S17** <sup>1</sup>H NMR spectrum (400 MHz, DMSO-d<sub>6</sub>, 298 K) of tosyl starch prepared in CTAB (2.62 mmol) in the presence of TsCl (equiv. per AGU)

## 5. $^1\text{H}$ -NMR spectra of substituted tosyl starch samples

### 5.1 Azide-substituted tosyl starch prepared in DMSO

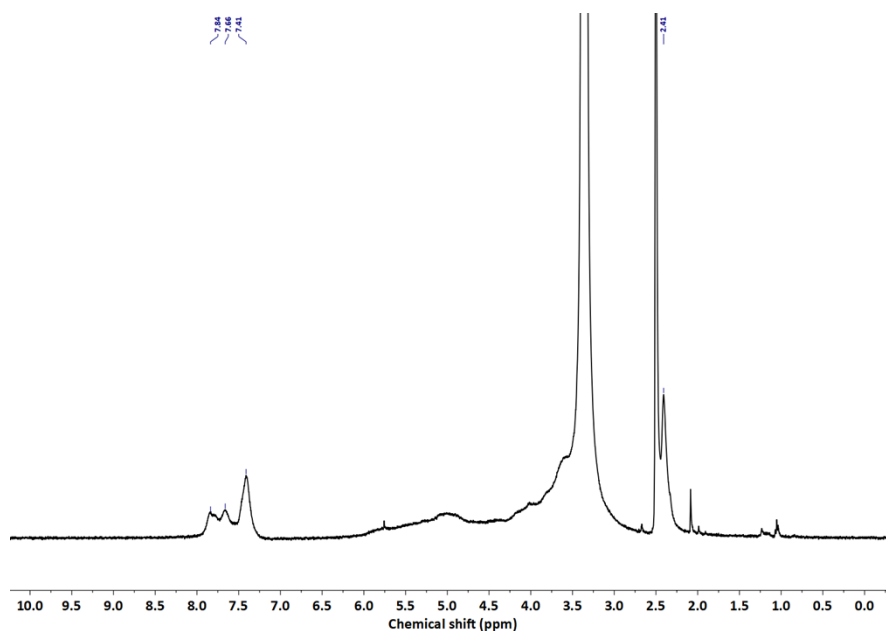

**Fig. S18**  $^1\text{H}$  NMR spectrum (400 MHz, DMSO- $d_6$ , 298 K) of azide-substituted tosyl starch prepared in DMSO

### 5.2 Phthalimide-substituted tosyl starch prepared in DMSO

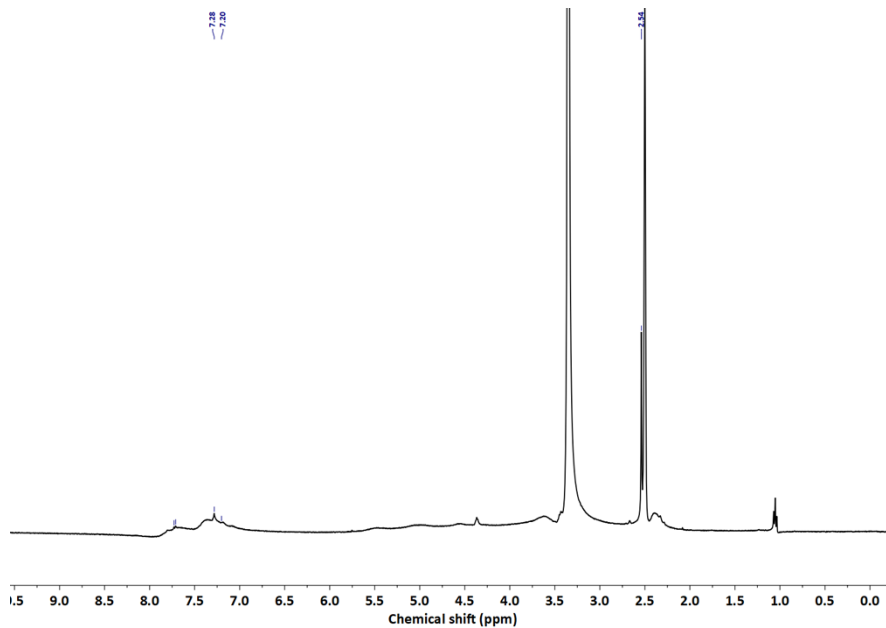

**Fig. S19**  $^1\text{H}$  NMR spectrum (400 MHz, DMSO- $d_6$ , 298 K) of phthalimide-substituted tosyl starch prepared in DMSO

### 5.3 Azide-substituted tosyl starch prepared in NaOH-urea-Brij® 30

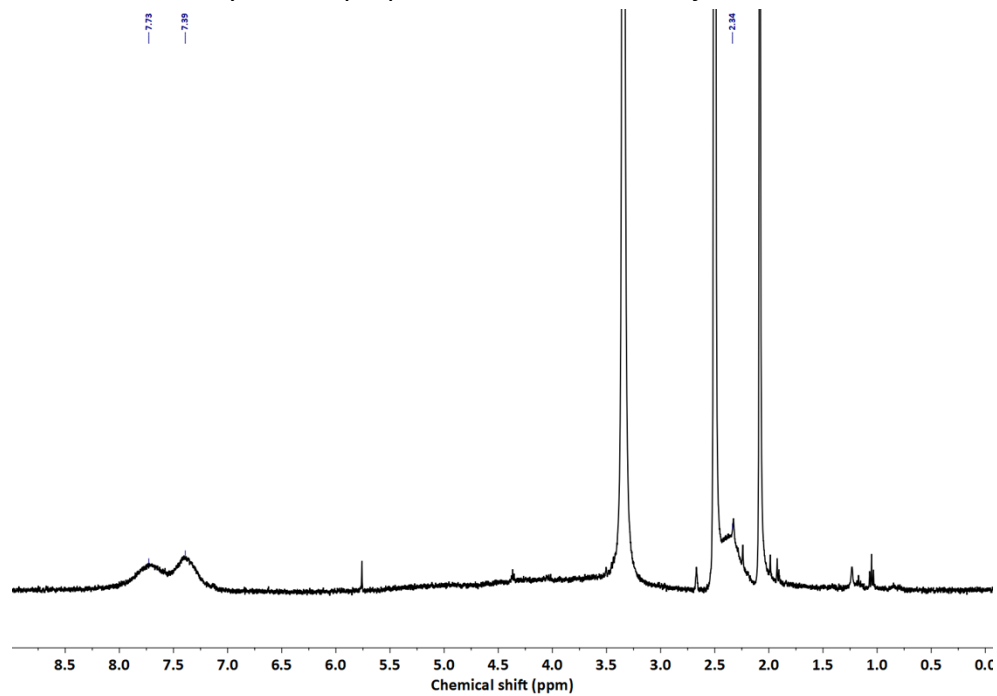

**Fig. S20** <sup>1</sup>H NMR spectrum (400 MHz, DMSO-d<sub>6</sub>, 298 K) of azide-substituted tosyl starch prepared in NaOH-urea-Brij® 30

### 5.4 Phthalimide-substituted tosyl starch prepared in NaOH-urea-Brij® 30

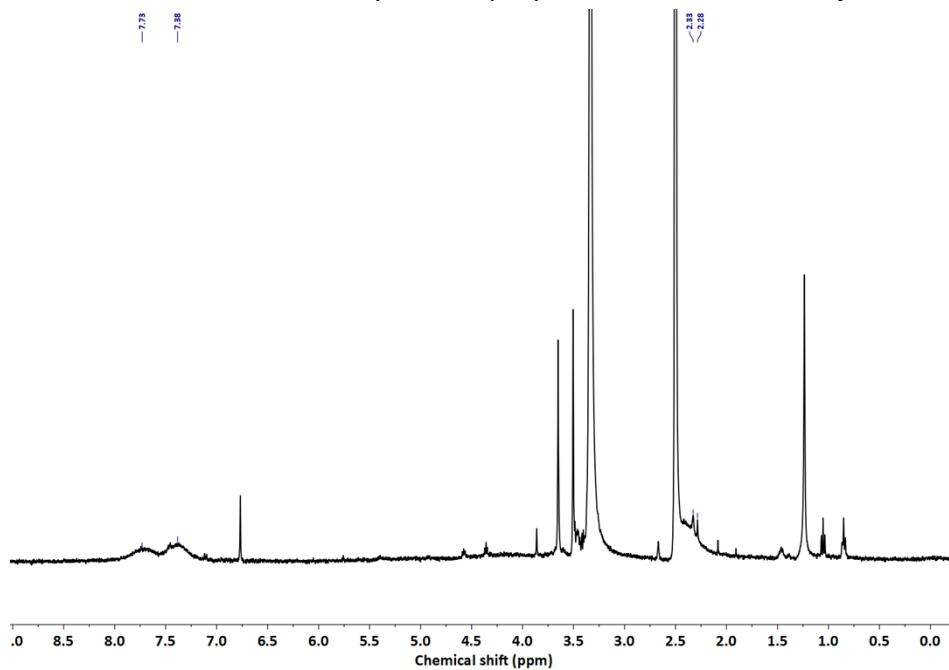

**Fig. S21** <sup>1</sup>H NMR spectrum (400 MHz, DMSO-d<sub>6</sub>, 298 K) of phthalimide-substituted tosyl starch prepared in NaOH-urea-Brij® 30

## 6 ATR-FTIR spectra of substituted tosyl starch samples

### 6.1 Azide-substituted tosyl starch prepared in DMSO

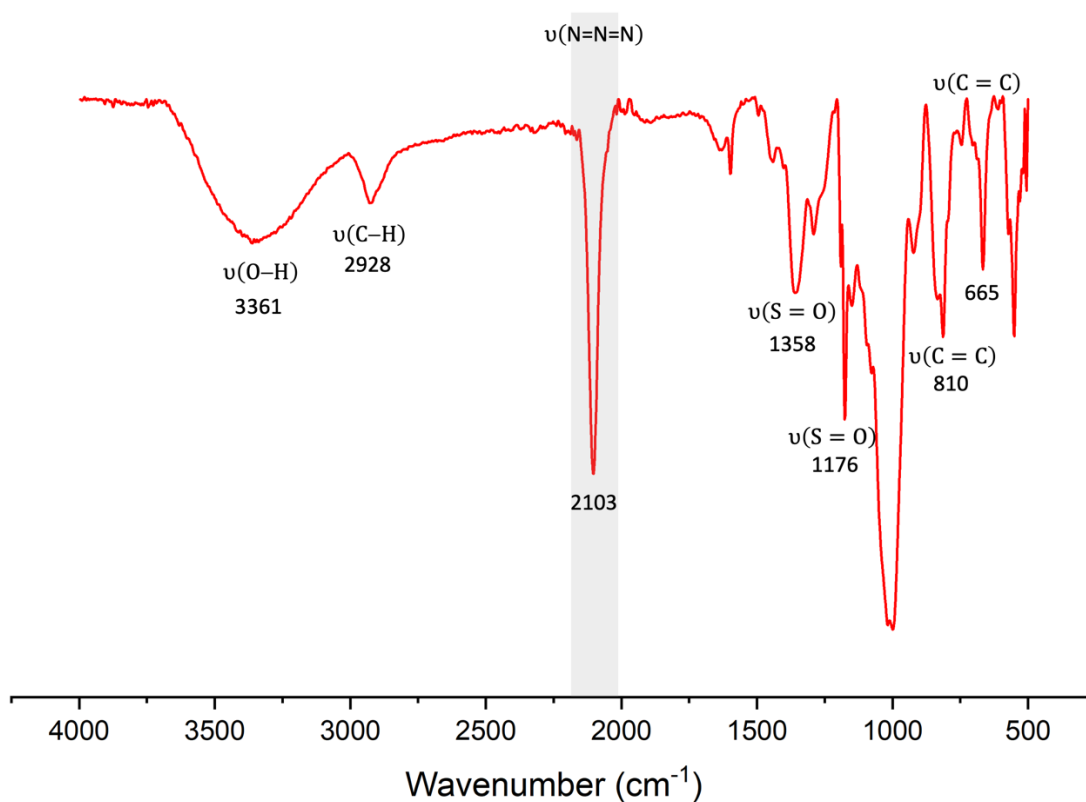

**Fig. S22** FTIR spectra of azide-substituted tosyl starch prepared in DMSO

**Table S2** FTIR peak assignments of azide-substituted tosyl starch prepared in DMSO

| $\bar{\nu}(\text{cm}^{-1})$ | Vibrational Mode                         |
|-----------------------------|------------------------------------------|
| 3600-3000                   | O-H stretching                           |
| 2928                        | $\text{CH}_2$ , $\text{CH}_3$ stretching |
| 2103                        | Azide $\text{N=N=N}$ stretching          |
| 1358                        | Symmetric $\text{S=O}$ stretching        |
| 1176                        | Asymmetric $\text{S=O}$ stretching       |
| 810, 665                    | Aromatic $\text{C=C}$ bending            |

## 6.2 Phthalimide-substituted tosyl starch prepared in DMSO

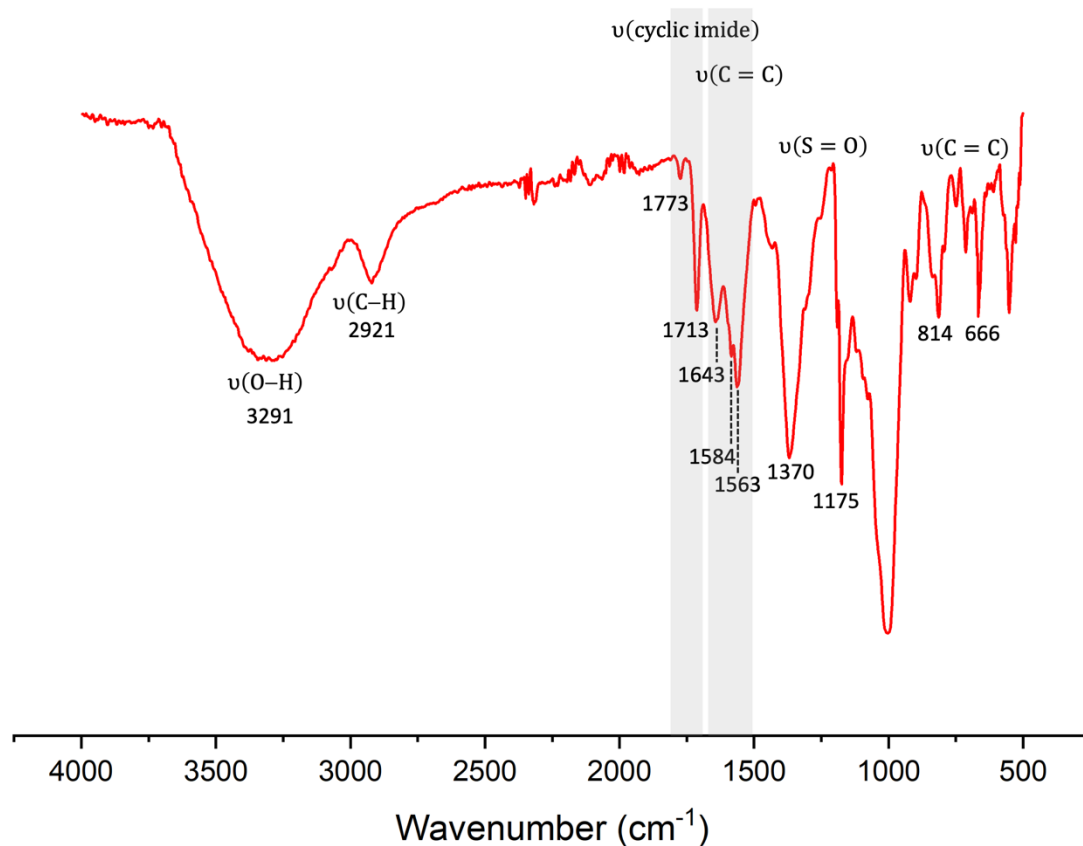

**Fig. S23** FTIR spectra of phthalimide-substituted tosyl starch prepared in DMSO

**Table S3** FTIR peak assignments of phthalimide-substituted tosyl starch prepared in DMSO

| $\bar{\nu}(\text{cm}^{-1})$ | Vibrational Mode                             |
|-----------------------------|----------------------------------------------|
| 3600-3000                   | O-H stretching                               |
| 2921                        | CH <sub>2</sub> , CH <sub>3</sub> stretching |
| 1773, 1713                  | Cyclic imide stretching                      |
| 1643                        | Aromatic C=C bending                         |
| 1584, 1563                  | $\alpha,\beta$ -unsaturated C=O stretching   |
| 1370                        | Symmetric S=O stretching                     |
| 1175                        | Asymmetric S=O stretching                    |
| 814, 666                    | Aromatic C=C bending                         |

### 6.3 Azide-substituted tosyl starch prepared in NaOH-urea-Brij® 30

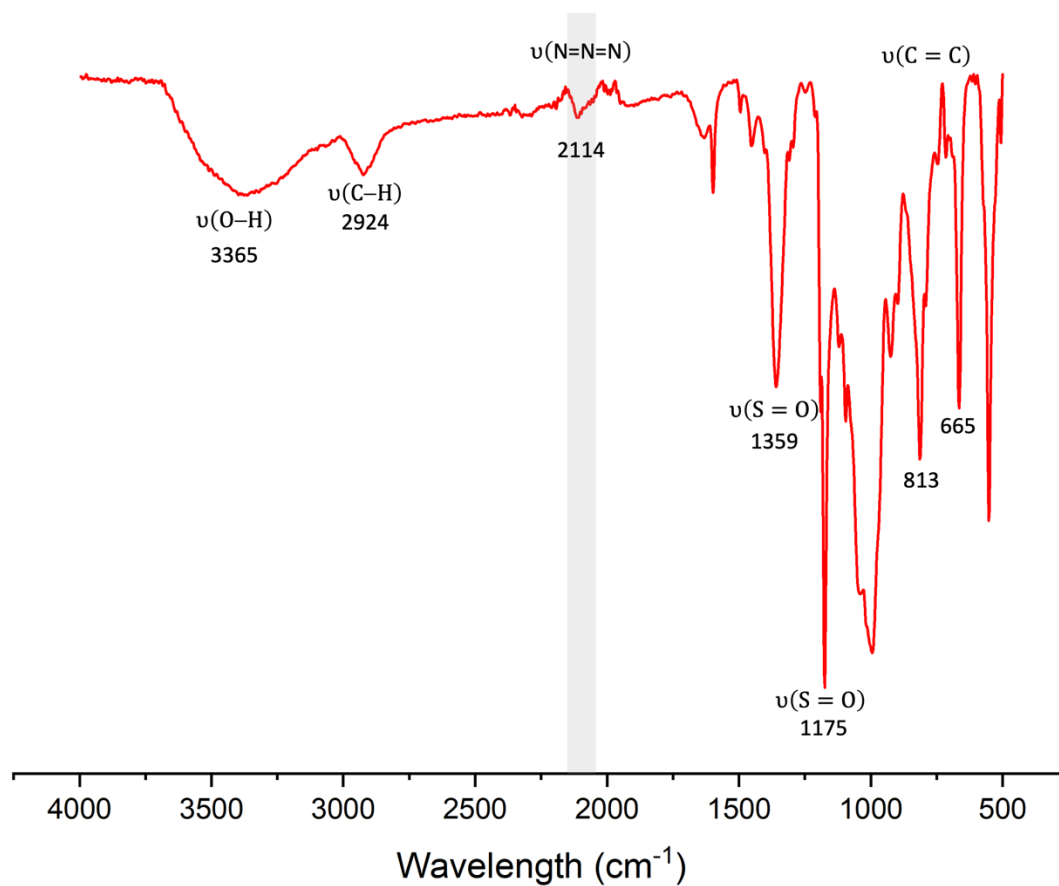

**Fig. S24** FTIR spectra of azide-substituted tosyl starch prepared in NaOH-urea-Brij® 30

**Table S4** FTIR peak assignments of azide-substituted tosyl starch prepared in NaOH-urea-Brij® 30

| $\bar{\nu}(\text{cm}^{-1})$ | Vibrational Mode                             |
|-----------------------------|----------------------------------------------|
| 3600-3000                   | O-H stretching                               |
| 2924                        | CH <sub>2</sub> , CH <sub>3</sub> stretching |
| 2114                        | Azide N=N=N stretching                       |
| 1359                        | Symmetric S=O stretching                     |
| 1175                        | Asymmetric S=O stretching                    |
| 813, 665                    | Aromatic C=C bending                         |

#### 6.4 Phthalimide-substituted tosyl starch prepared in NaOH-urea-Brij® 30

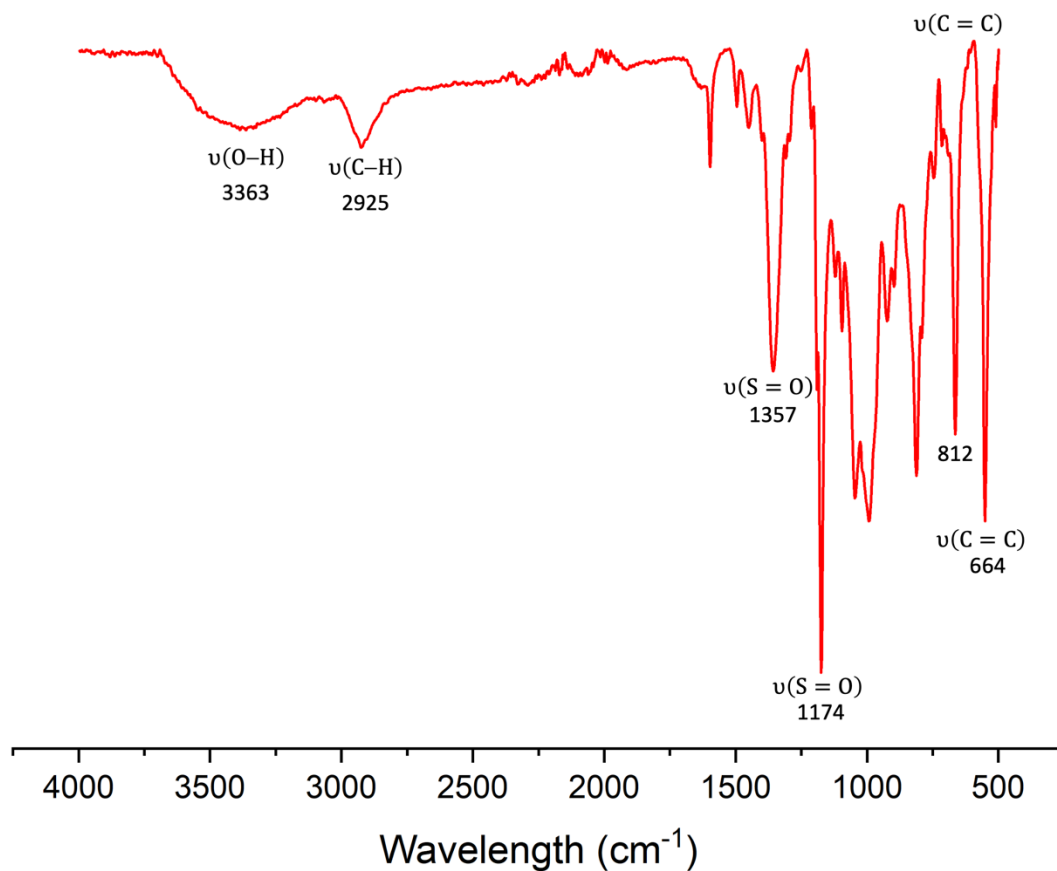

**Fig. S25** FTIR spectra of phthalimide-substituted tosyl starch prepared in NaOH-urea-Brij® 30

**Table S5** FTIR peak assignments of phthalimide-substituted tosyl starch prepared in NaOH-urea-Brij® 30

| $\bar{\nu}(\text{cm}^{-1})$ | Vibrational Mode                             |
|-----------------------------|----------------------------------------------|
| 3600-3000                   | O-H stretching                               |
| 2925                        | CH <sub>2</sub> , CH <sub>3</sub> stretching |
| 1357                        | Symmetric S=O stretching                     |
| 1174                        | Asymmetric S=O stretching                    |
| 812, 664                    | Aromatic C=C bending                         |



## 7 Thermogravimetric analysis curves of starch samples

### 7.1 Native starch

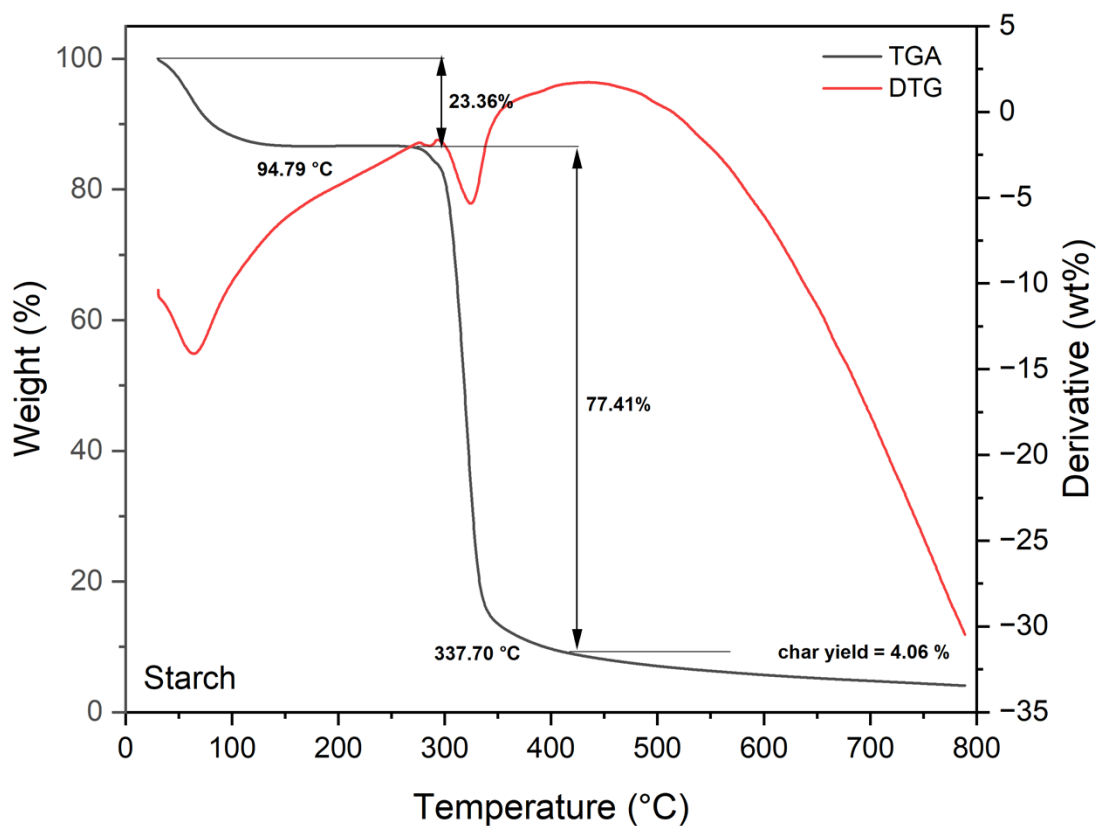

Fig. S26 TGA curve of native starch recorded under a N<sub>2</sub> flow with a heating rate of 10 °C min<sup>-1</sup>

7.2 Tosyl starch ( $DS_{Tos} = 0.33$ )

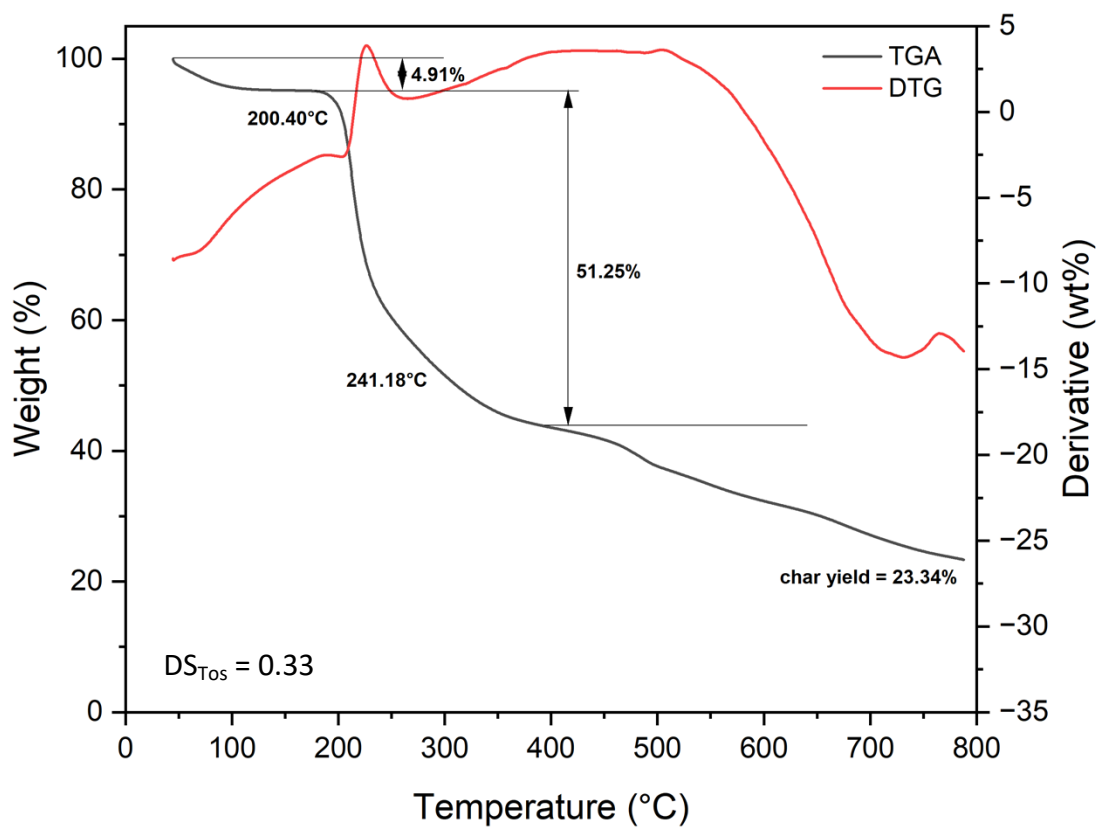

**Fig. S27** TGA curve of tosyl starch ( $DS_{Tos} = 0.33$ ) recorded under a  $N_2$  flow with a heating rate of  $10\text{ }^{\circ}C\text{ min}^{-1}$

### 7.3 Tosyl starch ( $DS_{Tos} = 0.54$ )

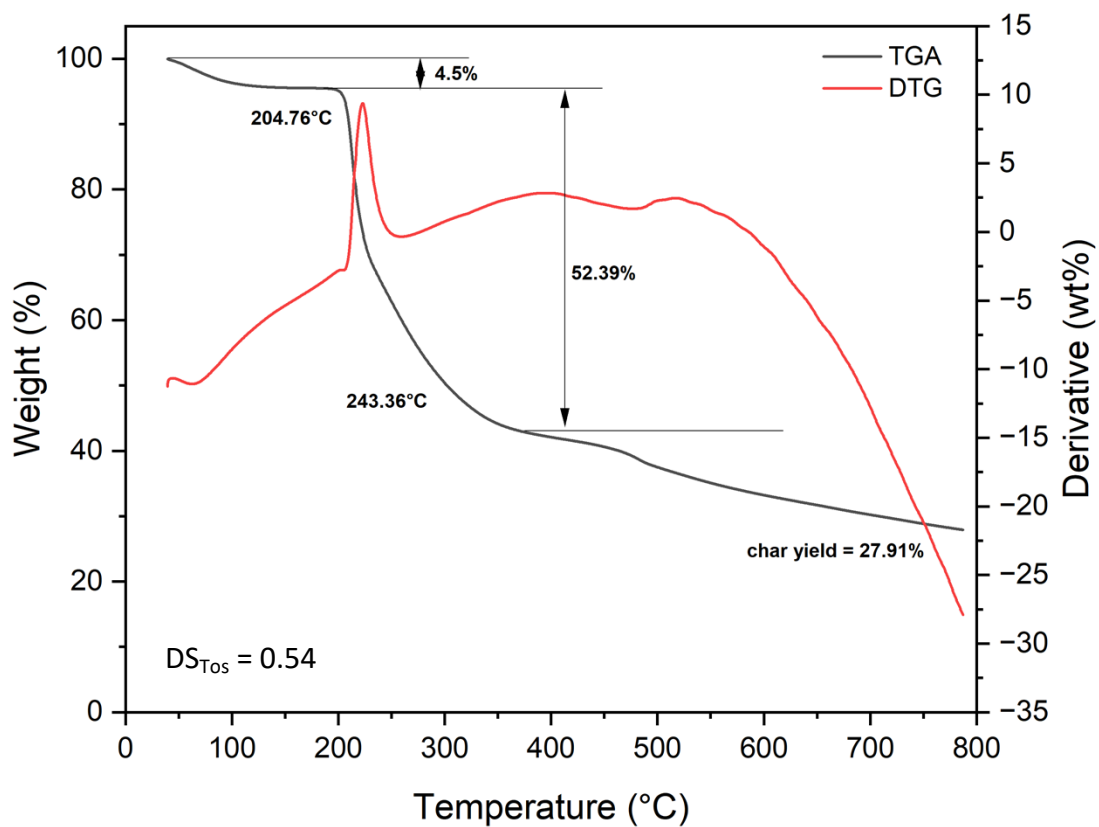

**Fig. S28** TGA curve of tosyl starch ( $DS_{Tos} = 0.54$ ) recorded under a  $N_2$  flow with a heating rate of  $10\text{ }^{\circ}C\text{ min}^{-1}$

7.4 Tosyl starch ( $DS_{Tos} = 0.62$ )

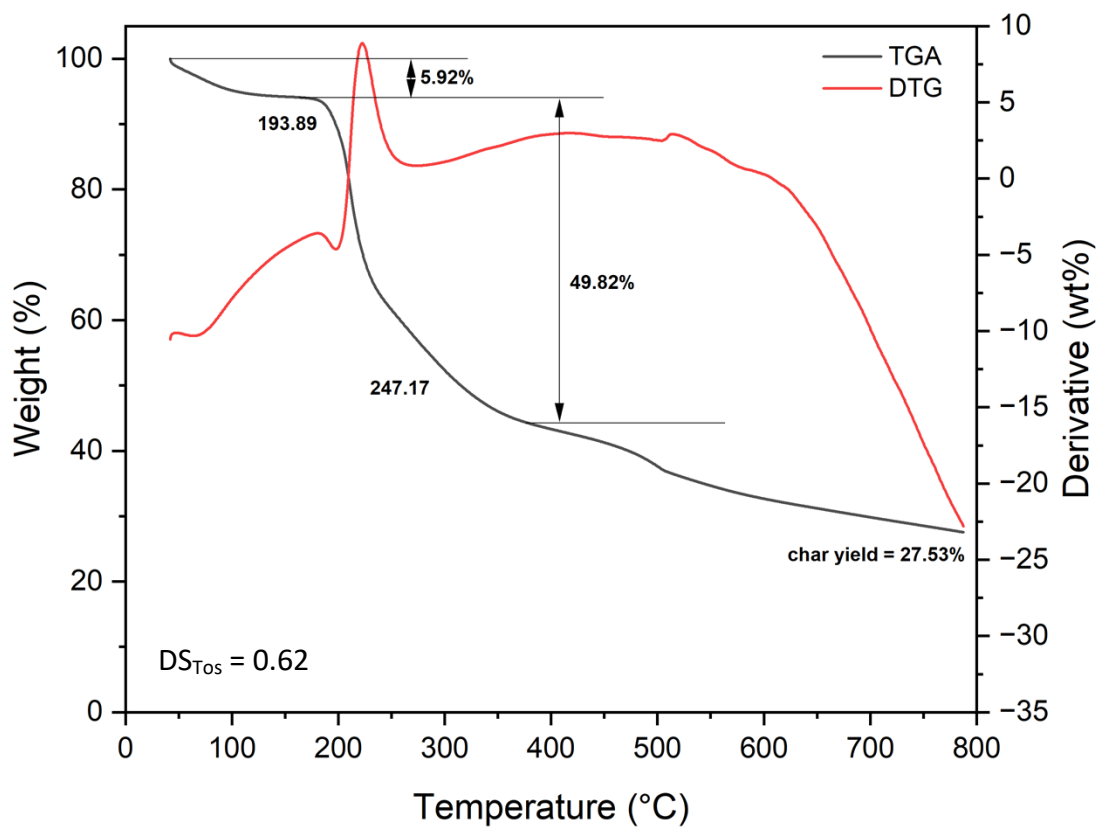

**Fig. S29** TGA curve of tosyl starch ( $DS_{Tos} = 0.62$ ) recorded under a  $N_2$  flow with a heating rate of  $10\text{ }^\circ\text{C min}^{-1}$

7.5 Tosyl starch ( $DS_{Tos} = 0.65$ )

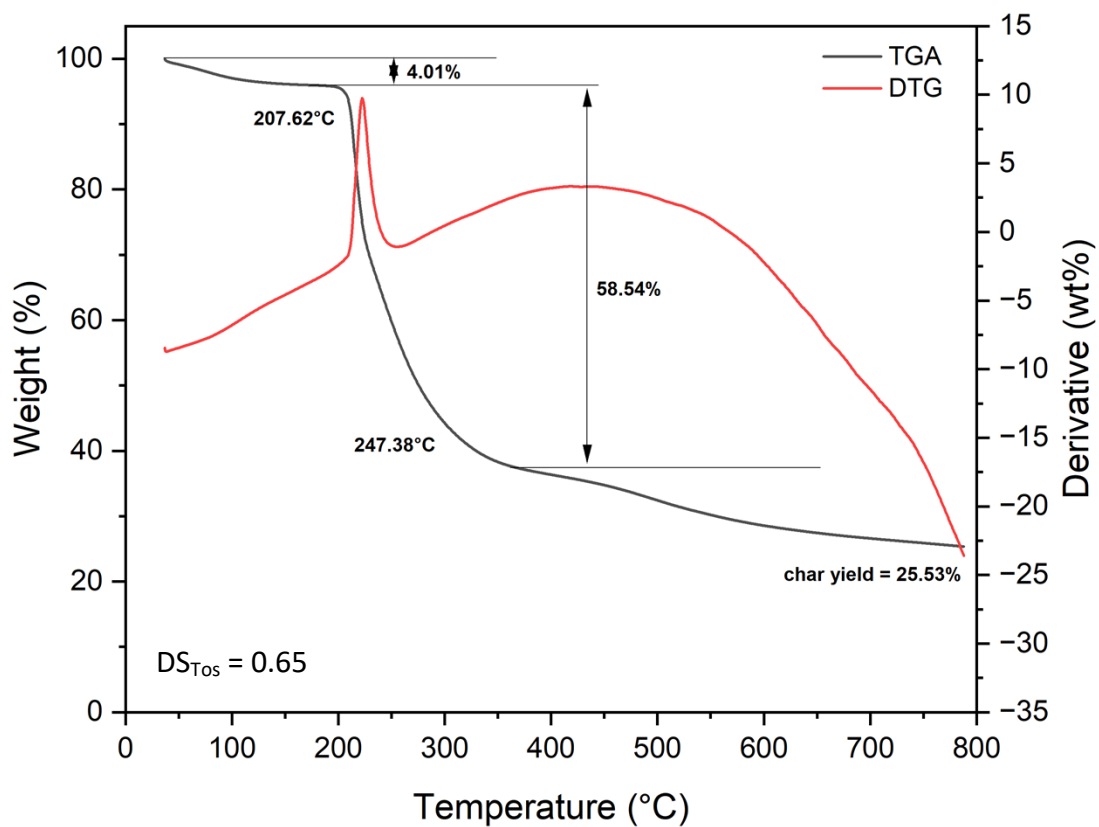

**Fig. S30** TGA curve of tosyl starch ( $DS_{Tos} = 0.65$ ) recorded under a  $N_2$  flow with a heating rate of  $10\text{ }^{\circ}C\text{ min}^{-1}$
